# Supplementary material for: Nanoremediation of As and metals polluted soils by means of graphene oxide nanoparticles
Source: PubMed Central journal article supplement (PMC7002751; doi:10.1038/s41598-020-58852-4), 2020-02-05
Supplement: 41598_2020_58852_MOESM1_ESM.pdf [file 41598_2020_58852_MOESM1_ESM.pdf]

## **Supplementary material**

### **Nanoremediation of As and metals polluted soils by means of graphene oxide nanoparticles**

Diego Baragaño<sup>a\*</sup>, Rubén Forján<sup>a</sup>, Lorena Welte<sup>b</sup>, J.R Gallego<sup>a</sup>

<sup>a</sup> INDUROT and Environmental Technology, Biotechnology and Geochemistry Group, Campus de Mieres, Universidad de Oviedo, Mieres (Asturias, Spain).

<sup>b</sup> Kleinscale S.L., Calle Montoro 4 9D, 28922, Alcorcón, Madrid, Spain

\*Corresponding author E-mail: [diegobcoto@uniovi.es](mailto:diegobcoto@uniovi.es)

**Supplementary Table S1.** Mean values and error of pH and electrical conductivity of soil samples treated with nGO and nZVI nanoparticles. For each type of nanoparticles, data with the same letter do not differ significantly ( $p < 0.05$ ).

|                | <b>Treatment</b> | <b>Dose</b> | <b>pH</b>  | <b>EC (dS.m<sup>-1</sup>)</b> |            |
|----------------|------------------|-------------|------------|-------------------------------|------------|
| <b>Soil AM</b> | Control          | 0%          | 8.46±0.04a | 0.36±0.01c                    |            |
|                | nGO              | 0.20%       | 8.23±0.05a | 0.39±0.01c                    |            |
|                |                  | 1%          | 7.75±0.04b | 0.56±0.02b                    |            |
|                |                  | 5%          | 7.18±0.03c | 1.00±0.01a                    |            |
|                | nZVI             | 0.20%       | 8.34±0.05a | 0.40±0.01c                    |            |
|                |                  | 1%          | 8.27±0.04a | 0.45±0.01b                    |            |
|                |                  | 5%          | 8.40±0.04a | 0.62±0.01a                    |            |
|                | <b>Soil A</b>    | Control     | 0%         | 8.54±0.03a                    | 0.17±0.01c |
|                |                  | nGO         | 0.20%      | 8.32±0.03b                    | 0.28±0.01b |
| 1%             |                  |             | 8.14±0.01c | 0.34±0.01b                    |            |
| 5%             |                  |             | 7.84±0.04d | 1.12±0.05a                    |            |
| nZVI           |                  | 0.20%       | 8.52±0.03a | 0.20±0.01c                    |            |
|                |                  | 1%          | 8.52±0.03a | 0.19±0.01c                    |            |
|                |                  | 5%          | 8.51±0.01a | 0.28±0.01a                    |            |

**Supplementary Table S2.** Soil AM (polluted by As + heavy metal) and soil A (polluted by As).

| Parameters                | Units              | Soils               |       |      |
|---------------------------|--------------------|---------------------|-------|------|
|                           |                    | AM                  | A     |      |
| General                   | <b>pH</b>          |                     | 8.31  | 8.91 |
|                           | <b>OM</b>          | %                   | 1.54  | 0.2  |
|                           | <b>TN</b>          | g·kg <sup>-1</sup>  | 0.6   | 0.2  |
|                           | <b>Available-P</b> |                     | 22    | 27   |
|                           | <b>K</b>           |                     | 1.6   | 3.8  |
|                           | <b>Mg</b>          | mg·kg <sup>-1</sup> | 7.1   | 20.6 |
|                           | <b>Ca</b>          |                     | 18.2  | 14   |
|                           | <b>Na</b>          |                     | 3.5   | 1.1  |
|                           | <b>Silt</b>        |                     | 6.91  | 3.81 |
|                           | <b>Sand</b>        | %                   | 87.9  | 80.7 |
|                           | <b>Clay</b>        |                     | 5.21  | 15.5 |
| Pseudototal Concentration | <b>Ni</b>          |                     | 8.41  | 23.1 |
|                           | <b>Cu</b>          |                     | 79.0  | 19.1 |
|                           | <b>Zn</b>          | mg·kg <sup>-1</sup> | 4,900 | 47.1 |
|                           | <b>As</b>          |                     | 37.2  | 1100 |
|                           | <b>Cd</b>          |                     | 17.1  | <DL  |
|                           | <b>Pb</b>          |                     | 390   | 14.1 |
| Available Concentration   | <b>Ni</b>          |                     | 0.30  | <DL  |
|                           | <b>Cu</b>          |                     | 2.77  | <DL  |
|                           | <b>Zn</b>          | mg·kg <sup>-1</sup> | 1,635 | 0.32 |
|                           | <b>As</b>          |                     | 0.91  | 21.0 |
|                           | <b>Cd</b>          |                     | 6.77  | <DL  |
|                           | <b>Pb</b>          |                     | 21.0  | <DL  |

Values (n = 3). <DL: Below detection limit; OM: organic matter; TN: total nitrogen; Bioavailable-P= available phosphorus (Olsen Phosphorus).
